# Supplementary material for: Anion-driven tetrel bond-induced engineering of lead(ii) architectures with N′-(1-(2-pyridyl)ethylidene)nicotinohydrazide: experimental and theoretical findings
Source: Royal Society of Chemistry journal article supplement (doi:10.1039/c6qi00477f), 2016-11-25
Supplement: c6qi00477f1.pdf [file c6qi00477f1.pdf]

## Electronic Supplementary Information

### Anion-driven tetrel bond-induced engineering of lead(II) architectures with *N'*-(1-(2-pyridyl)ethylidene)nicotinohydrazide: Experimental and theoretical findings

Ghodrat Mahmoudi,<sup>\*a</sup> Damir A. Safin,<sup>\*b</sup> Mariusz P. Mitoraj,<sup>\*c</sup> Mojtaba Amini,<sup>\*a</sup> Maciej Kubicki,<sup>d</sup> Thomas Doert,<sup>e</sup> Franziska Locherer<sup>e</sup> and Michel Fleck<sup>f</sup>

<sup>a</sup>Department of Chemistry, Faculty of Science, University of Maragheh, P.O. Box 55181-83111, Maragheh, Iran.

E-mail: mahmoudi\_ghodrat@yahoo.co.uk, mamini@maragheh.ac.ir

<sup>b</sup>Institute of Condensed Matter and Nanosciences, Molecules, Solids and Reactivity (IMCN/MOST), Université catholique de Louvain, Place L. Pasteur 1, 1348 Louvain-la-Neuve, Belgium. E-mail: damir.a.safin@gmail.com

<sup>c</sup>Department of Theoretical Chemistry, Faculty of Chemistry, Jagiellonian University, R. Ingardena 3, 30-060 Cracow, Poland. E-mail: mitoraj@chemia.uj.edu.pl

<sup>d</sup>Faculty of Chemistry, Adam Mickiewicz University in Poznan, Umultowska 89b, 61-614 Poznan, Poland

<sup>e</sup>Department of Chemistry and Food Chemistry, Dresden University of Technology Helmholtzstrasse 10, 01069 Dresden, Germany

<sup>f</sup>Institute for Mineralogy and Crystallography, University of Vienna, Althanstrasse 14, 1090 Vienna, Austria

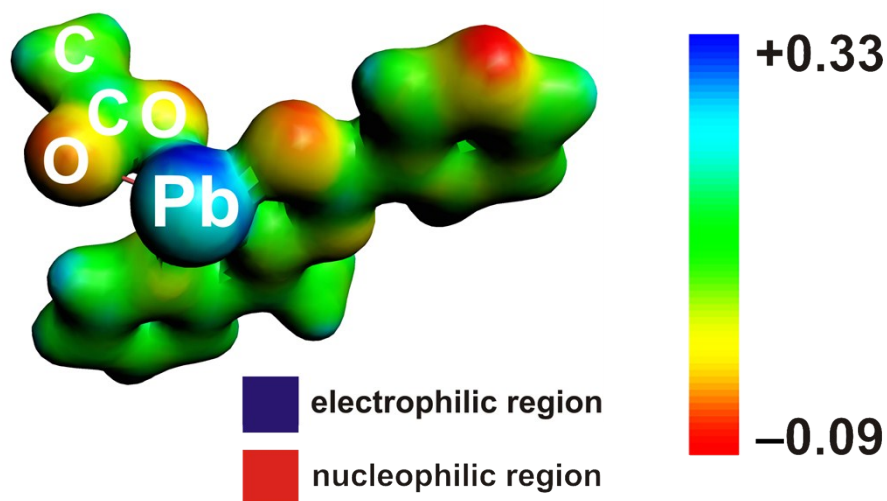

**Fig. S1** The molecular electrostatic potential (DFT/BLYP-D3/ZORA/TZP) for the [PbL(OAc)] unit.

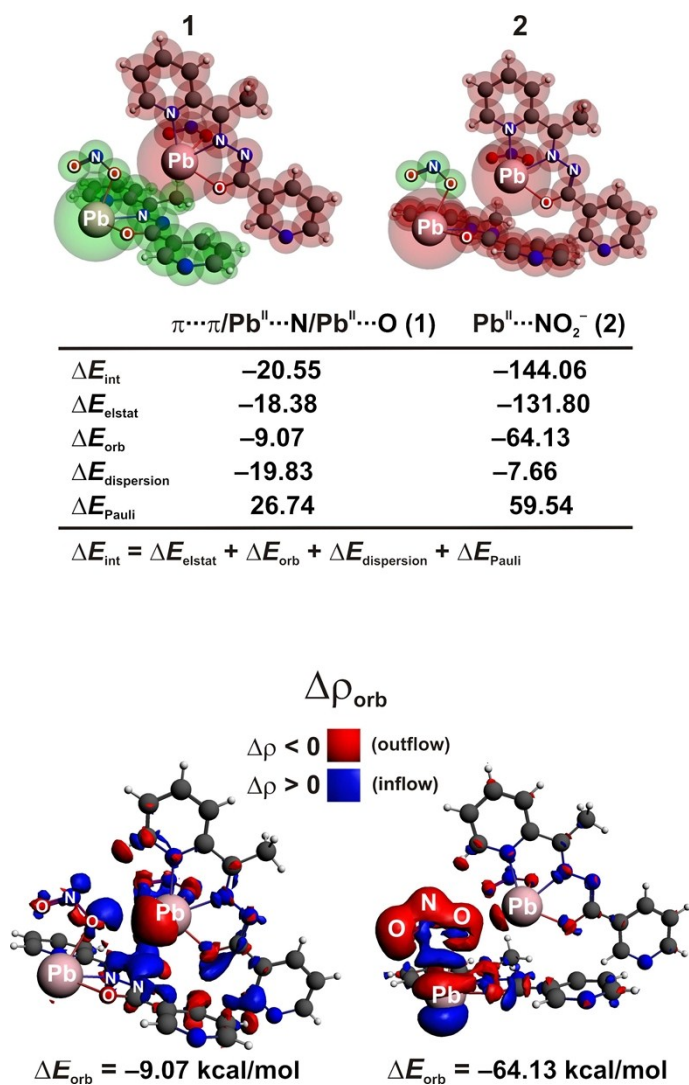

**Fig. S2** (top) Cluster models of  $[\text{PbL}(\text{NO}_2)]_n$  together with the fragmentation patterns **1** and **2** applied in the ETS-NOCV analysis. (bottom) The overall deformation densities  $\Delta \rho_{\text{orb}}$  of **1** and **2** with the corresponding energies  $\Delta E_{\text{orb}}$ .

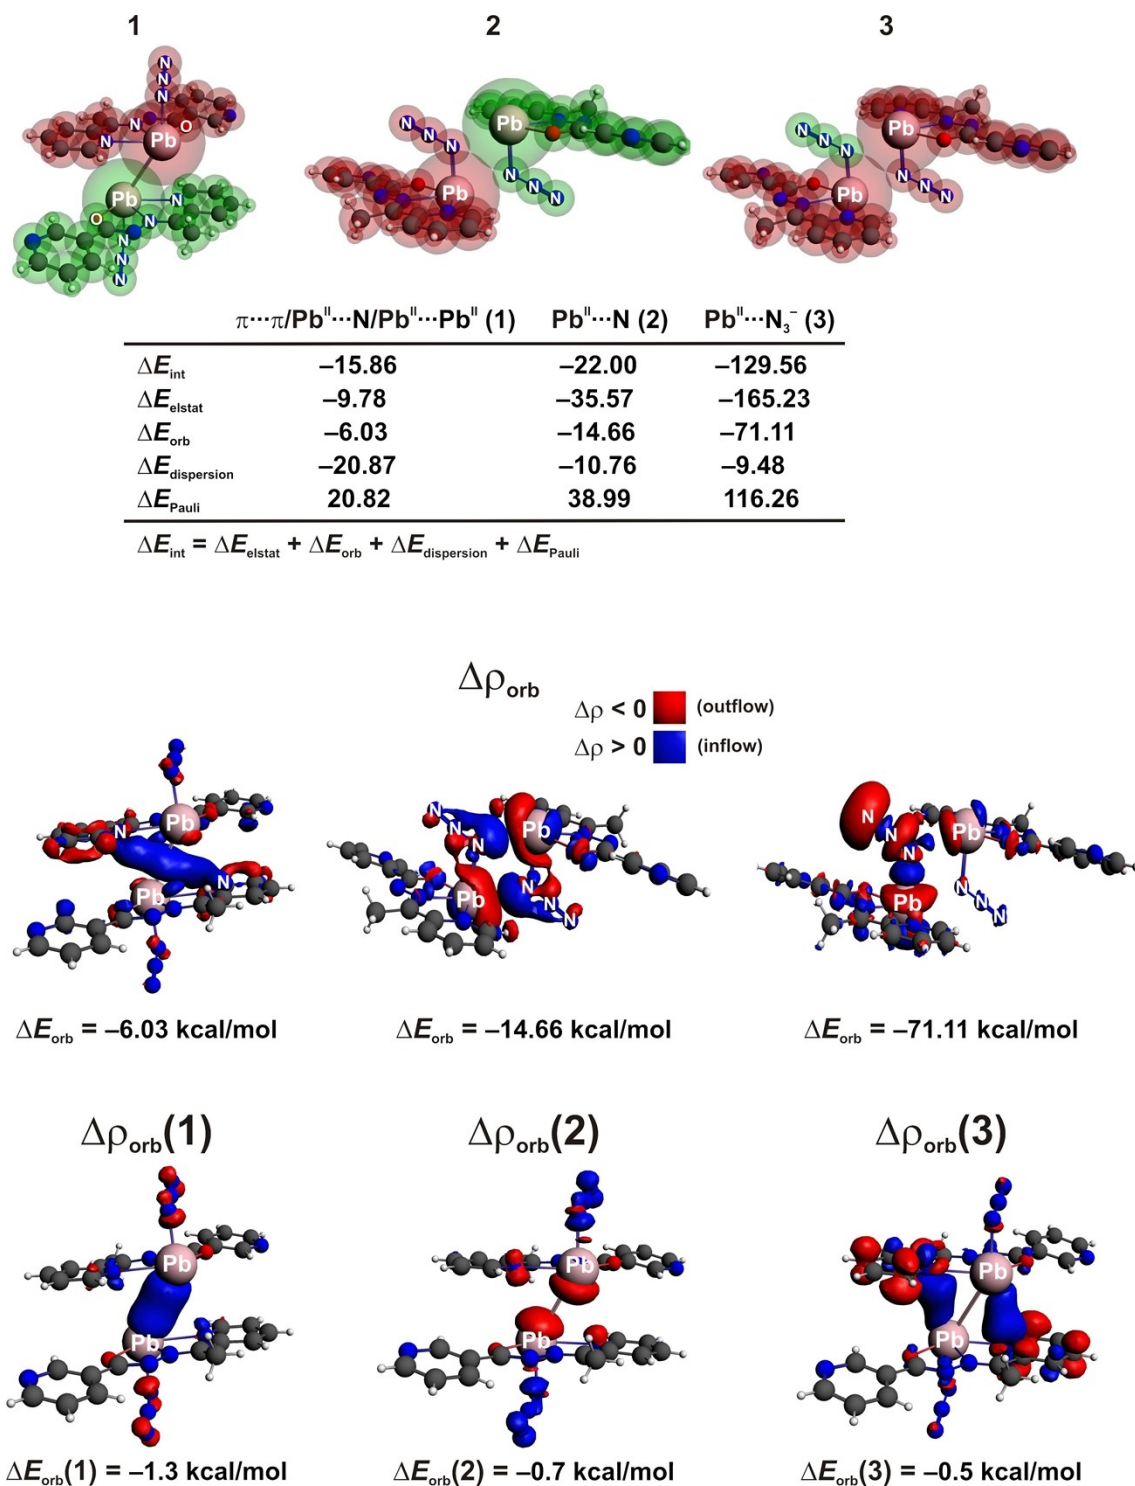

**Fig. S3** (top) Cluster models of  $[\text{PbLN}_3]_n$  together with the fragmentation patterns **1–3** applied in the ETS-NOCV analysis. (middle) The overall deformation densities  $\Delta \rho_{\text{orb}}$  of **1–3** with the corresponding energies  $\Delta E_{\text{orb}}$ . (bottom) The main NOCV-formation densities  $\Delta \rho_{\text{orb}}(1\text{–}3)$  with the corresponding energies  $\Delta E_{\text{orb}}(1\text{–}3)$  depicted for the bonding pattern **1**.

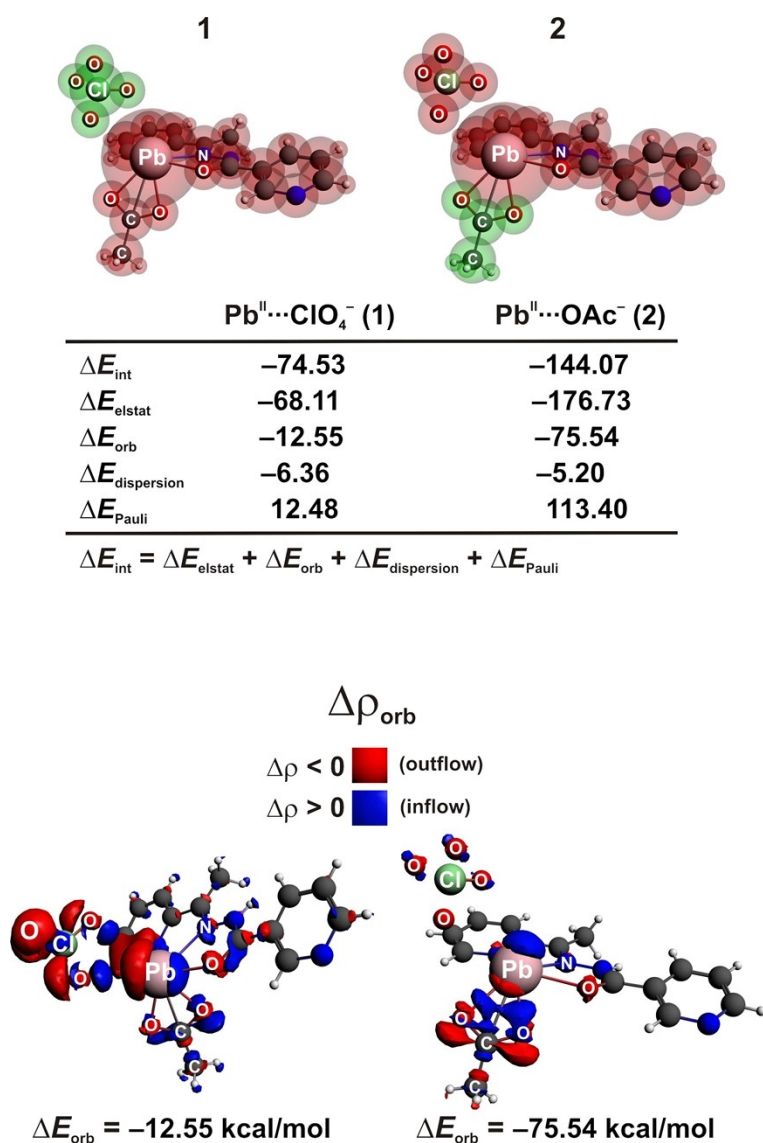

**Fig. S4** (top) Cluster models of  $\{[\text{Pb}(\text{HL})(\text{OAc})]\text{ClO}_4\}_n$  together with the fragmentation patterns **1** and **2** applied in the ETS-NOCV analysis. (bottom) The overall deformation densities  $\Delta \rho_{\text{orb}}$  of **1** and **2** with the corresponding energies  $\Delta E_{\text{orb}}$ .

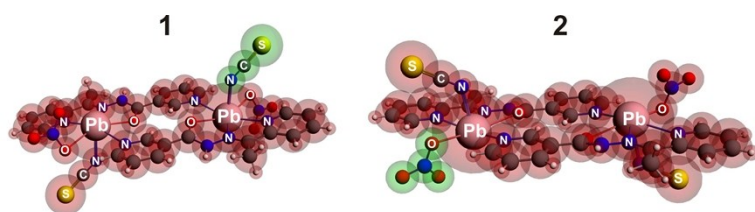

|                                                                                                                                     | Pb <sup>II</sup> ...NCS <sup>-</sup> (1) | Pb <sup>II</sup> ...NO <sub>3</sub> <sup>-</sup> (2) |
|-------------------------------------------------------------------------------------------------------------------------------------|------------------------------------------|------------------------------------------------------|
| $\Delta E_{\text{int}}$                                                                                                             | -96.54                                   | -96.87                                               |
| $\Delta E_{\text{elstat}}$                                                                                                          | -101.75                                  | -94.46                                               |
| $\Delta E_{\text{orb}}$                                                                                                             | -52.15                                   | -33.76                                               |
| $\Delta E_{\text{dispersion}}$                                                                                                      | -7.43                                    | -6.86                                                |
| $\Delta E_{\text{Pauli}}$                                                                                                           | 64.80                                    | 38.21                                                |
| $\Delta E_{\text{int}} = \Delta E_{\text{elstat}} + \Delta E_{\text{orb}} + \Delta E_{\text{dispersion}} + \Delta E_{\text{Pauli}}$ |                                          |                                                      |

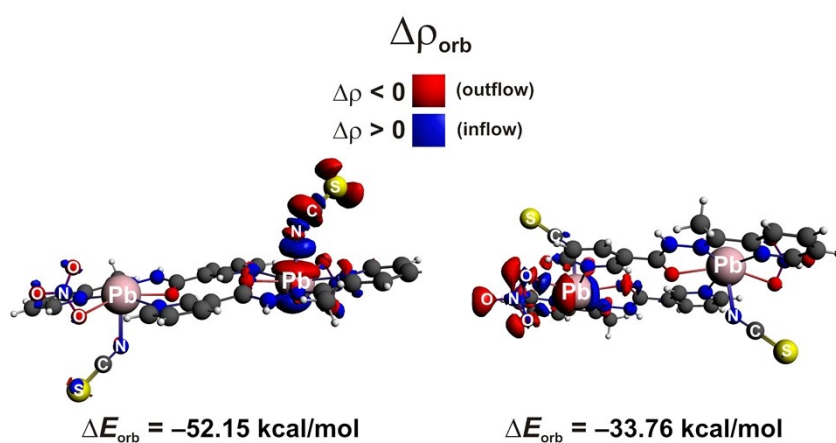

**Fig. S5** (top) Cluster models of  $[\text{Pb}_2(\text{HL})_2(\text{NO}_3)_2(\text{NCS})_2]$  together with the fragmentation patterns **1** and **2** applied in the ETS-NOCV analysis. (bottom) The overall deformation densities  $\Delta\rho_{\text{orb}}$  of **1** and **2** with the corresponding energies  $\Delta E_{\text{orb}}$ .

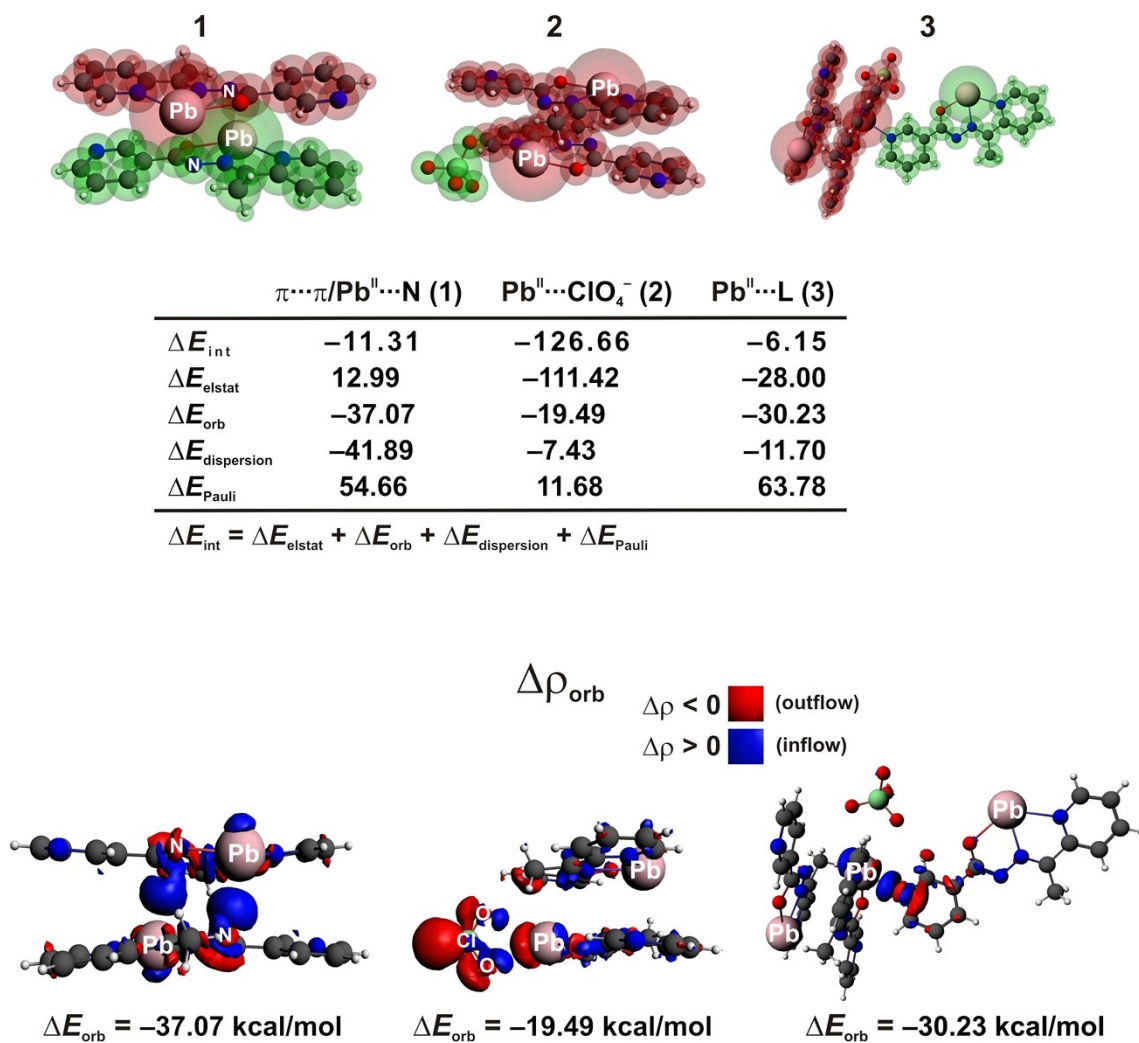

**Fig. S6** (top) Cluster models of  $\{[\text{PbL}]\text{ClO}_4\}_n \cdot n\text{H}_2\text{O}$  together with the fragmentation patterns **1–3** applied in the ETS-NOCV analysis. (bottom) The overall deformation densities  $\Delta\rho_{\text{orb}}$  of **1–3** with the corresponding energies  $\Delta E_{\text{orb}}$ .

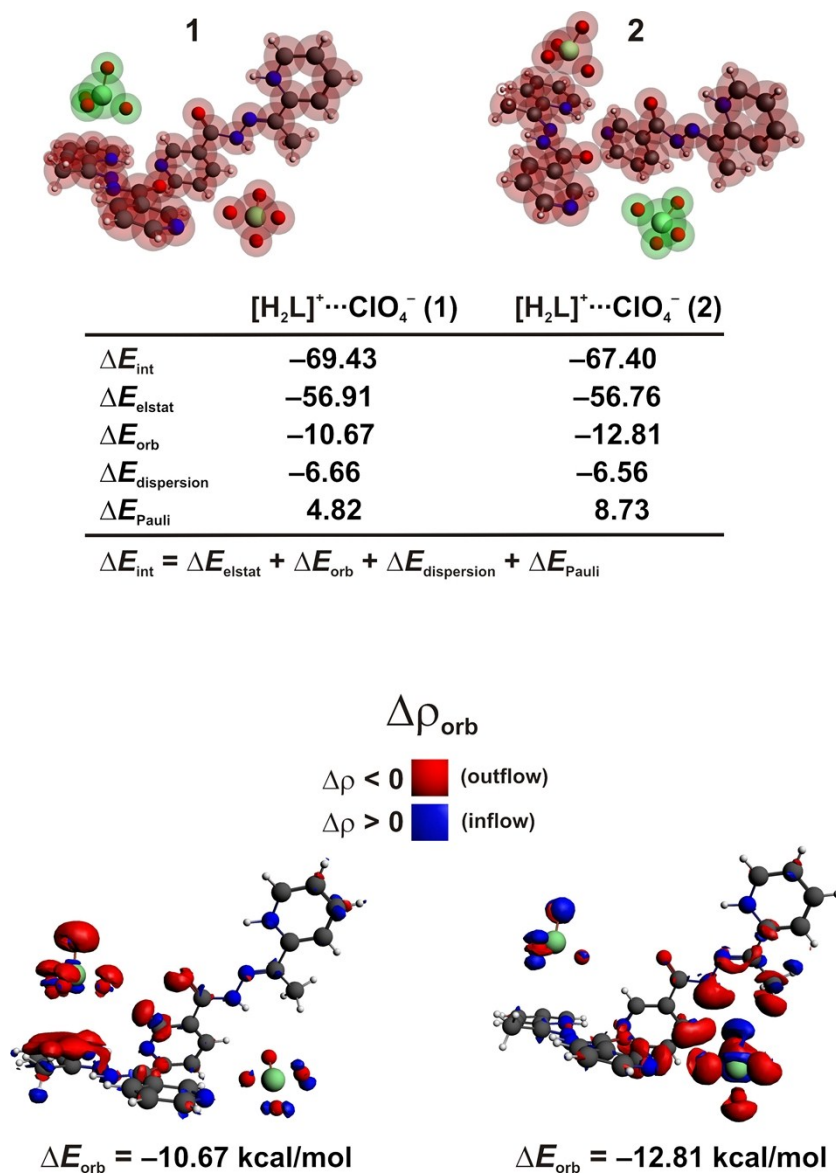

**Fig. S7** (top) Cluster models of  $[\text{H}_2\text{L}]\text{ClO}_4$  together with the fragmentation patterns **1** and **2** applied in the ETS-NOCV analysis. (bottom) The overall deformation densities  $\Delta\rho_{\text{orb}}$  of **1** and **2** with the corresponding energies  $\Delta E_{\text{orb}}$ .
